# Supplementary material
Source: MDPI journal article supplement (https://www.mdpi.com/1999-4907/13/2/289)
Supplement: s1 [file s1]

## Supplementary material

**Table S1** Site characteristics across a successional gradient in the subalpine forest on eastern Qinghai-Tibet Plateau.

| succession stage | Forest type               | Coordinate        | Altitude (m a.s.l.) | direction (°) | Canopy cover (%) | Soil name | Dominant vegetation                                                    | Plot number |
|------------------|---------------------------|-------------------|---------------------|---------------|------------------|-----------|------------------------------------------------------------------------|-------------|
| S1               | Shrubs community          | 32°55'N, 104°08'E | 2483                | NE45          | 75               | Fluvisol  | <i>H. rhamnoides</i> L.                                                | 3           |
|                  |                           | 32°57'N, 104°07'E | 2600                | SW225         | 52               | Fluvisol  | <i>Salix</i> spp.                                                      | 3           |
|                  |                           | 32°58'N, 104°05'E | 2602                | S185          | 68               | Fluvisol  | <i>Salix</i> spp.                                                      | 3           |
|                  |                           | 32°58'N, 104°04'E | 2643                | WS243         | 48               | Fluvisol  | <i>U. pumila</i> L.                                                    | 3           |
| S2               | Broad-leaved forest       | 32°57'N, 104°07'E | 2601                | SW225         | 70               | Argosols  |                                                                        | 3           |
|                  |                           | 32°54'N, 104°09'E | 2468                | ES105         | 60               | Argosols  | <i>Betula</i> spp.; <i>Populus</i> spp.                                | 3           |
|                  |                           | 32°57'N, 104°07'E | 2536                | E90           | 55               | Fluvisol  |                                                                        | 3           |
| S3               | Mixed forest              | 32°57'N, 104°04'E | 2730                | WN280         | 55               | Argosols  | <i>A. faxoniana</i> Rehd.; <i>P. purpurea</i> Mast; <i>Betula</i> spp. | 3           |
|                  |                           | 32°57'N, 104°04'E | 2801                | ES115         | 60               | Argosols  |                                                                        | 3           |
|                  |                           | 32°54'N, 104°03'E | 2962                | ES134         | 60               | Argosols  | <i>Salix</i> spp.                                                      | 3           |
| S4               | Mid-coniferous forest     | 32°59'N, 104°02'E | 2798                | N359          | 61               | Cambosols | <i>L. gmelinii</i> (Rupr.) Kuzen.                                      | 3           |
|                  |                           | 32°52'N, 104°02'E | 3075                | NE17          | 52               | Cambosols | <i>S. saltuaria</i> Rehd.                                              | 3           |
| S5               | Mature coniferous forest  | 33°00'N, 104°01'E | 2885                | ES128         | 65               | Argosols  | <i>A. faxoniana</i> Rehd.                                              | 3           |
|                  |                           | 32°53'N, 104°03'E | 3027                | SW125         | 62               | Argosols  |                                                                        | 3           |
| S6               | primary coniferous forest | 32°52'N, 104°02'E | 3068                | SE150         | 62               | Argosols  |                                                                        | 3           |
|                  |                           | 32°52'N, 104°02'E | 3199                | ES75          | 58               | Argosols  | <i>P. purpurea</i> Mast                                                | 3           |

S1 to S6 represent successional stages from 1 to 6, respectively; NE: North-East; SW: South-West; S: South; WS: West-South; ES: East-South; E: East; WN: West-North; N: North; SE: South-East.

**Table S2** Discrepancy of relative abundance of the dominant phyla of soil bacterial and fungal community composition among different forest succession stages.

| Bacterial phyla  | H      | <i>P</i> value | Fungal phyla       | H      | <i>P</i> value |
|------------------|--------|----------------|--------------------|--------|----------------|
| Proteobacteria   | 7.860  | 0.164          | Ascomycota         | 7.945  | 0.159          |
| Tenericutes      | 19.379 | 0.002**        | Basidiomycota      | 5.248  | 0.386          |
| Acidobacteria    | 12.175 | 0.032*         | Mortierellomycota  | 14.651 | 0.012*         |
| Firmicutes       | 21.274 | <0.001***      | Rozellomycota      | 17.58  | 0.004**        |
| Actinobacteria   | 18.892 | 0.002**        | Chytridiomycota    | 4.307  | 0.506          |
| Bacteroidetes    | 11.790 | 0.038*         | Mucoromycota       | 3.097  | 0.685          |
| Verrucomicrobia  | 10.246 | 0.069          | Zoopagomycota      | 4.322  | 0.504          |
| Gemmatimonadetes | 19.755 | <0.001***      | Glomeromycota      | 7.211  | 0.205          |
| Rokubacteria     | 16.124 | 0.006**        | GS01               | 11.886 | 0.036*         |
| Chloroflexi      | 16.942 | 0.005**        | Blastocladiomycota | 6.729  | 0.242          |

Significant effect: \* $p < 0.05$ , \*\* $p < 0.01$ , \*\*\* $p < 0.001$ . Kruskal-Wallis test.

**Table S3** The analysis of similarities (ANOSIM) among different forest succession stages based on the distance algorithm of Bray–Curtis.

| Group | bacteria |                | Fungi   |                |
|-------|----------|----------------|---------|----------------|
|       | R-value  | <i>P</i> value | R-value | <i>P</i> value |
| S1-S2 | 0.01071  | 0.364          | 0.04711 | 0.207          |
| S1-S3 | 0.3193   | 0.004**        | 0.2169  | 0.002**        |
| S1-S4 | 0.2051   | 0.053          | 0.4465  | 0.001***       |
| S1-S5 | 0.3813   | 0.007**        | 0.4155  | 0.008**        |
| S1-S6 | 0.5269   | 0.001***       | 0.566   | 0.001***       |
| S2-S3 | 0.32     | 0.005**        | 0.3124  | 0.001***       |
| S2-S4 | 0.4481   | 0.005**        | 0.3493  | 0.004**        |
| S2-S5 | 0.5011   | 0.001***       | 0.3413  | 0.005**        |
| S2-S6 | 0.5897   | 0.001***       | 0.528   | 0.001***       |
| S3-S4 | 0.1046   | 0.169          | 0.2259  | 0.031*         |

|       |        |          |        |         |
|-------|--------|----------|--------|---------|
| S3-S5 | 0.2593 | 0.04*    | 0.1285 | 0.139   |
| S3-S6 | 0.581  | 0.001*** | 0.3188 | 0.009** |
| S4-S5 | 0.3463 | 0.013*   | 0.1537 | 0.1     |
| S4-S6 | 0.7926 | 0.002**  | 0.4352 | 0.004** |
| S5-S6 | 0.4667 | 0.004**  | 0.2898 | 0.002** |

S1 to S6 represent successional stages from 1 to 6, respectively; Significant effect: \* $p < 0.05$ , \*\* $p < 0.01$ , \*\*\* $p < 0.001$ . **Table S4** The detrended correspondence analysis (DCA) based on based on the OTUs data at 97% sequence identity.

|                 | Bacteria |         |         |         | fungi  |         |         |         |
|-----------------|----------|---------|---------|---------|--------|---------|---------|---------|
|                 | DCA1     | DCA2    | DCA3    | DCA4    | DCA1   | DCA2    | DCA3    | DCA4    |
| Eigenvalues     | 0.1239   | 0.02476 | 0.03420 | 0.01638 | 0.2775 | 0.13428 | 0.11861 | 0.13744 |
| Decorana values | 0.2180   | 0.01907 | 0.01472 | 0.01104 | 0.2888 | 0.09129 | 0.05638 | 0.01634 |
| Axis lengths    | 1.5119   | 0.74397 | 0.91304 | 0.53708 | 1.6512 | 1.32027 | 1.47367 | 1.44479 |

**Table S5** The detection of collinearity of forest variables by the analysis of Variance Inflation Factor (VIF).

| Forest variable | SOC      | TN        | C:N      | T        | pH       | WD       | NWD      | Altitude | Canopy   |
|-----------------|----------|-----------|----------|----------|----------|----------|----------|----------|----------|
| First VIF       | 46.19128 | 35.488101 | 3.765846 | 1.450231 | 1.296448 | 1.931329 | 1.849688 | 2.668003 | 1.496639 |
| Second VIF      | 2.519368 | —         | 1.947650 | 1.429947 | 1.296446 | 1.922745 | 1.792969 | 2.420485 | 1.370652 |
